# Supplementary material
Source: PubMed Central journal article supplement (PMC3236031)
Supplement: NIHMS328638-supplement-1_si_001.pdf [file NIHMS328638-supplement-1_si_001.pdf]

## Supporting Information for

# Nanodisc vs. Macrodisc for NMR of Membrane Proteins

Sang Ho Park, Sabrina Berkamp, Gabriel A. Cook, Michelle K. Chan, Hector Viadiu, and Stanley J. Opella\*

Department of Chemistry and Biochemistry, University of California, San Diego, 9500 Gilman Drive, La Jolla, California 92093-0307, USA

### Sample preparation

Preparation of micelle, isotropic bicelle, and magnetically alignable bicelle samples of Pf1 [1], p7 [2], and CXCR1 [3-5] were described previously.

The 14-residue peptide (>98% purity, Ac-DYLKAFYDKLKEAF-NH<sub>2</sub>) was purchased from NEO Peptide ([www.NEO-Peptide.com](http://www.NEO-Peptide.com)). DMPC was purchased from Anatrace ([www.affymetrix.com](http://www.affymetrix.com)), DHPC from Avanti Polar Lipids ([www.avantilipids.com](http://www.avantilipids.com)), and Triton X-100 from Sigma-Aldrich ([www.sigmaaldrich.com](http://www.sigmaaldrich.com)). The procedure for preparation of nanodisc and macrodisc samples is similar to that of bicelle samples. Lyophilized powder of the 14-residue peptide was dissolved in an aqueous buffer at a concentration of 80mg/ml. Nanodisc and macrodisc samples were prepared by adding appropriate amounts of an aqueous solution of the 14-residue peptide to DMPC liposomes (for empty bilayer discs) or DMPC proteoliposomes (for protein-containing bilayer discs) to a final molar ratio (DMPC/peptide) of 1.67 and 13.3, respectively. Final lipid contents in the nanodiscs and macrodiscs were 5% (w/v) and 10% (w/v), respectively.

Pf1, p7, and MerE proteoliposomes was prepared by mixing 2-3 mg protein solubilized in 500  $\mu$ l trifluoroethanol with 20 mg DMPC solubilized in 500  $\mu$ l chloroform at a ratio of 1:1 (v/v). The organic solvent was then evaporated under a stream of nitrogen gas to obtain a thin, transparent protein-lipid film, which was placed under high vacuum overnight. An aqueous solution of the 14-residue peptide was added to the dry film and vortexed and cool-heated (ice/40°C) several times and then allowed to equilibrate to room temperature. Preparation of CXCR1 proteoliposomes was described previously [6]. Upon macrodisc formation, the previously white dispersion of proteoliposomes becomes a clear and non-viscous solution between 0°C and 20°C.

Weakly aligned interleukin-8 (IL-8) sample was prepared by mixing IL-8 with macrodiscs in 20 mM HEPES, pH 5.5 at a final concentration of 0.5 mM IL-8 and 10% DMPC (w/v) macrodiscs.

### **NMR Spectroscopy**

The solution NMR experiments were performed at 50 °C on a Bruker DRX 600 MHz spectrometer equipped with 5 mm triple-resonance cold probe and z-axis gradient.  $^{15}\text{N}$  edited  $^1\text{H}$  NMR experiments were performed on uniformly  $^{15}\text{N}$  labeled samples incorporated in 100 mM DHPC micelles, isotropic DMPC:DHPC bicelles, and nanodisks with a protein concentration of 50-100  $\mu\text{M}$ . IPAP-HSQC spectra [7] obtained on isotropic and weakly aligned IL-8 were used to measure the  $^1\text{H}$ - $^{15}\text{N}$  residual dipolar couplings.

The  $^{15}\text{N}$  and  $^{31}\text{P}$  solid-state NMR spectra were obtained on a Bruker Avance spectrometer with a  $^1\text{H}$  resonance frequency of 700 MHz. The homebuilt  $^1\text{H}/^{15}\text{N}$  double-resonance probe had 5 mm inner diameter solenoid coil tuned to the  $^{15}\text{N}$  frequency, and an outer MAGC coil tuned to the  $^1\text{H}$  frequency [8]. The  $^{31}\text{P}$  solid-state NMR spectra were obtained using a homebuilt  $^1\text{H}/^{31}\text{P}$  double-resonance probe equipped with double-tuned scroll coil [9]. The one-dimensional  $^{31}\text{P}$  NMR spectra were obtained by direct excitation with a single pulse using a 6 s recycle delay. 64 scans were signal averaged with a 10 ms acquisition time for each spectrum. Continuous wave  $^1\text{H}$  decoupling utilized a  $B_1$  radio frequency field strength of 42 kHz during the acquisition period. The one-dimensional  $^{15}\text{N}$  solid-state NMR spectra were obtained by spin-lock cross-polarization with a contact time of 1 ms, a recycle delay of 6 s, and an acquisition time of 10 ms. 2048 transients were co-added, and an exponential function corresponding to 50 Hz of line broadening was applied prior to Fourier transformation.

### **Electron Microscopy**

A 2.5 ml solution of the sample was absorbed to a carbon-coated copper grid, washed with deionized water and stained with 0.75% uranyl acetate. Micrographs were taken in a 120 kV CM120 electron transmission electron microscope at a magnification of 50,000X and a defocus value of 1.5  $\mu\text{m}$ . Images were digitized with a Nikon SuperCool 9000 scanner using a step size of 6.25  $\mu\text{m}$ . All digitized micrographs were initially binned over 3 x 3 pixels yielding a pixel size on the specimen level of 3.81  $\text{\AA}$ . Particles were manually selected using the display program WEB and the SPIDER program was used for the subsequent image-processing steps [10]. A total of 3064 nanodisk particles

were selected and windowed into 80 x 80 pixels and 2754 150 x 150 pixels macrodiscs particles. Images were normalized and eight cycles of multi-reference alignment, multivariate statistical analysis and classification into 50 class averages were performed.

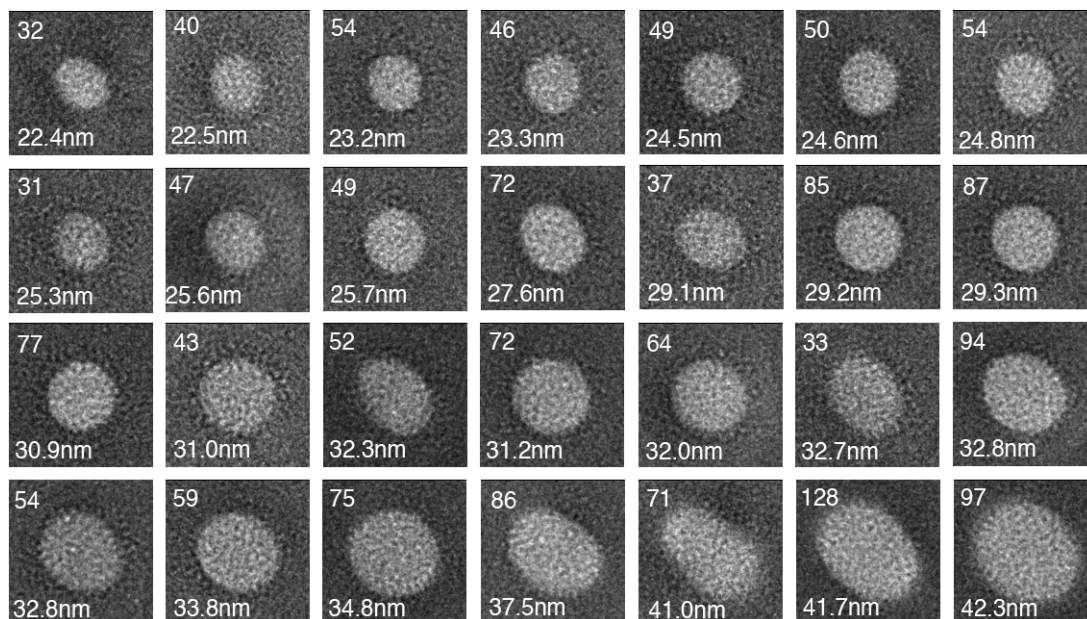

**Figure S1.** Single particle electron microscopy of macrodiscs. The length of the panels is 57.2 nm per side. The molar ratio of DMPC to 14-residue peptide was 13.3. The number of particles (top) and average size (bottom) of macrodiscs are shown in each panel.

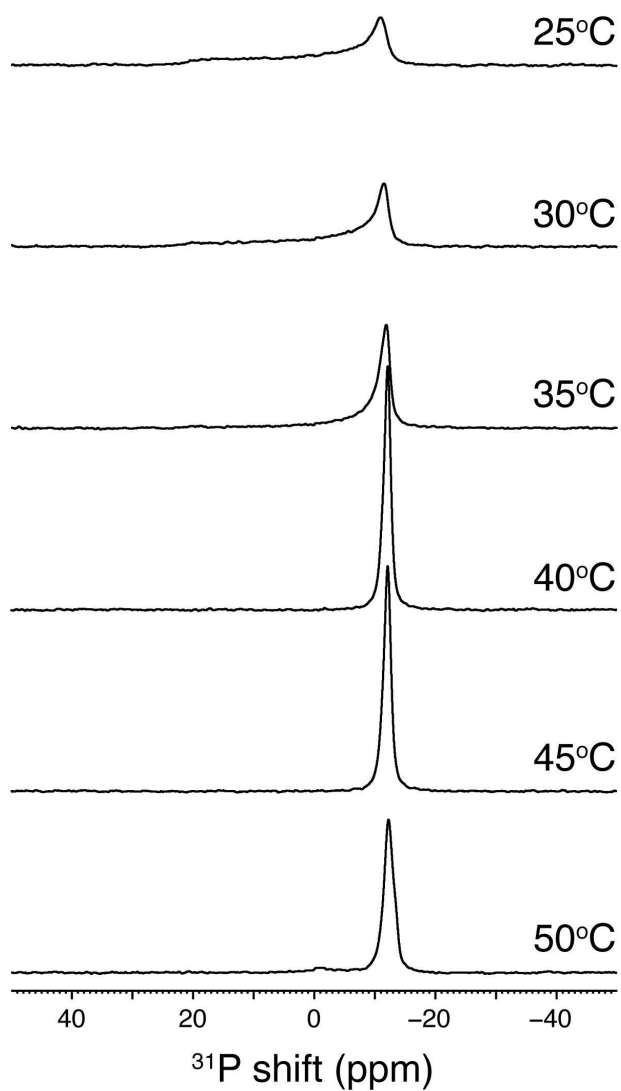

**Figure S2.** One-dimensional solid-state  $^{31}\text{P}$  NMR spectra of the membrane protein-containing macrodisc at various temperatures recorded at 284 MHz. 64 acquisitions were collected for each spectrum.

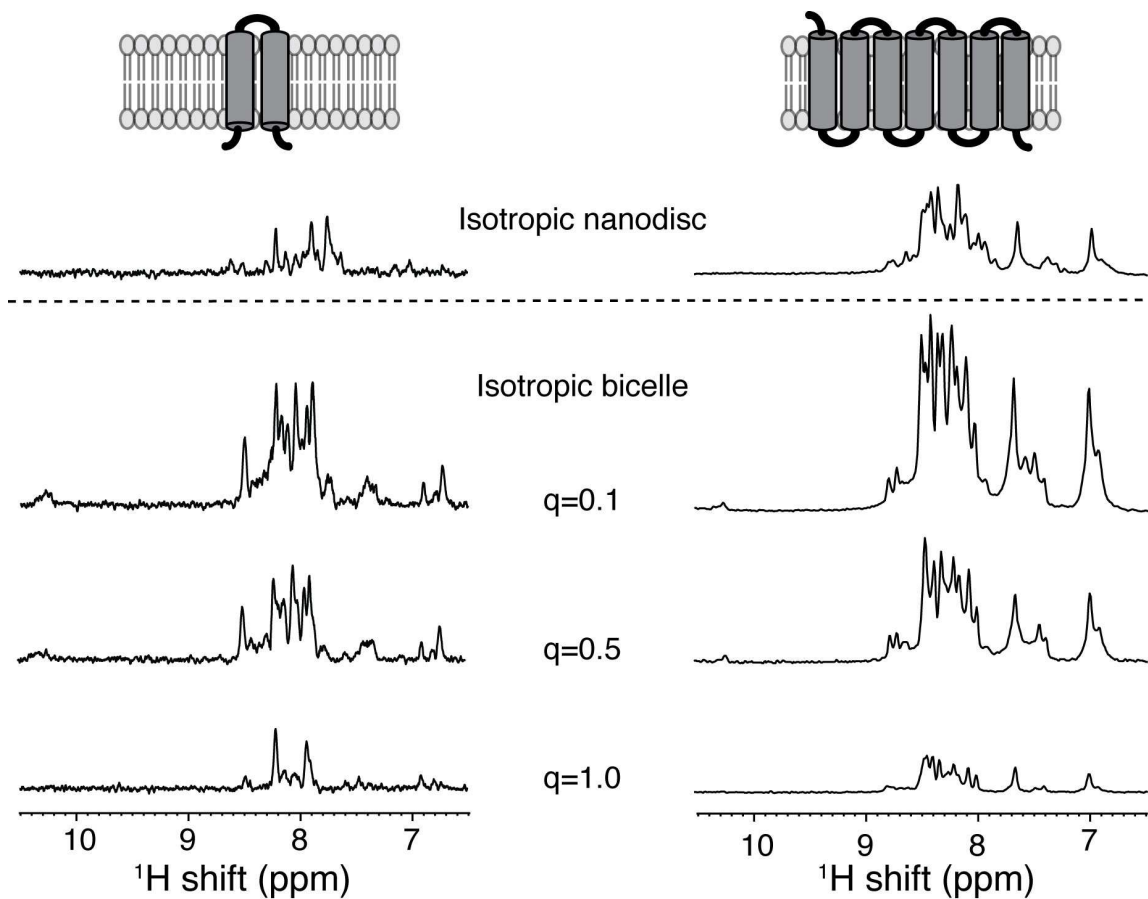

**Figure S3.** Comparison of  $^{15}\text{N}$  edited  $^1\text{H}$  solution NMR spectra of two transmembrane protein MerE (left) and seven transmembrane protein CXCR1 (right) reconstituted into isotropic nanodiscs and isotropic bicelles.

## References

- [1] S.H. Park, F.M. Marassi, D. Black, S.J. Opella, Structure and dynamics of the membrane-bound form of Pf1 coat protein: implications of structural rearrangement for virus assembly, *Biophys J*, 99 (2010) 1465-1474.
- [2] G.A. Cook, S.J. Opella, NMR studies of p7 protein from hepatitis C virus, *Eur Biophys J*, 39 (2010) 1097-1104.
- [3] S.H. Park, S. Prytulla, A.A. De Angelis, J.M. Brown, H. Kiefer, S.J. Opella, High-resolution NMR spectroscopy of a GPCR in aligned bicelles, *J Am Chem Soc*, 128 (2006) 7402-7403.
- [4] S.H. Park, F. Casagrande, B.B. Das, L. Albrecht, M. Chu, S.J. Opella, Local and global dynamics of the G protein-coupled receptor CXCR1, *Biochemistry*, 50 (2011) 2371-2380.
- [5] F. Casagrande, K. Maier, H. Kiefer, S.J. Opella, S.H. Park, Expression and purification of G-Protein Coupled Receptors for NMR structural studies, in: A.S. Robinson (Ed.) *Production of membrane proteins*, Wiley-vch, Weinheim, 2011.
- [6] S.H. Park, F. Casagrande, M. Chu, K. Maier, H. Kiefer, S.J. Opella, Optimization of Purification and Refolding of the Human Chemokine Receptor CXCR1 Improves the Stability of Proteoliposomes for Structure Determination, (submitted for publication).
- [7] K. Ding, A.M. Gronenborn, Sensitivity-enhanced 2D IPAP, TROSY-anti-TROSY, and E.COSY experiments: alternatives for measuring dipolar  $^{15}\text{N}$ - $^1\text{H}$  couplings, *J Magn Reson*, 163 (2003) 208-214.
- [8] C.V. Grant, Y. Yang, M. Glibowicka, C.H. Wu, S.H. Park, C.M. Deber, S.J. Opella, A Modified Alderman-Grant Coil makes possible an efficient cross-coil probe for high field solid-state NMR of lossy biological samples, *J Magn Reson*, 201 (2009) 87-92.
- [9] C.V. Grant, S.L. Sit, A.A. De Angelis, K.S. Khuong, C.H. Wu, L.A. Plesniak, S.J. Opella, An efficient  $(^1\text{H})/(^{31}\text{P})$  double-resonance solid-state NMR probe that utilizes a scroll coil, *J Magn Reson*, 188 (2007) 279-284.
- [10] J. Frank, M. Radermacher, P. Penczek, J. Zhu, Y. Li, M. Ladjadj, A. Leith, SPIDER and WEB: processing and visualization of images in 3D electron microscopy and related fields, *J Struct Biol*, 116 (1996) 190-199.
